# Supplementary material for: Impact of the COVID-19 Pandemic on Antimicrobial Consumption and Hospital-Acquired Candidemia and Multidrug-Resistant Bloodstream Infections
Source: MDPI journal article supplement (doi:10.3390/antibiotics9110816), 2020-11-17
Supplement: s1 [file s1]

## Supplementary Materials

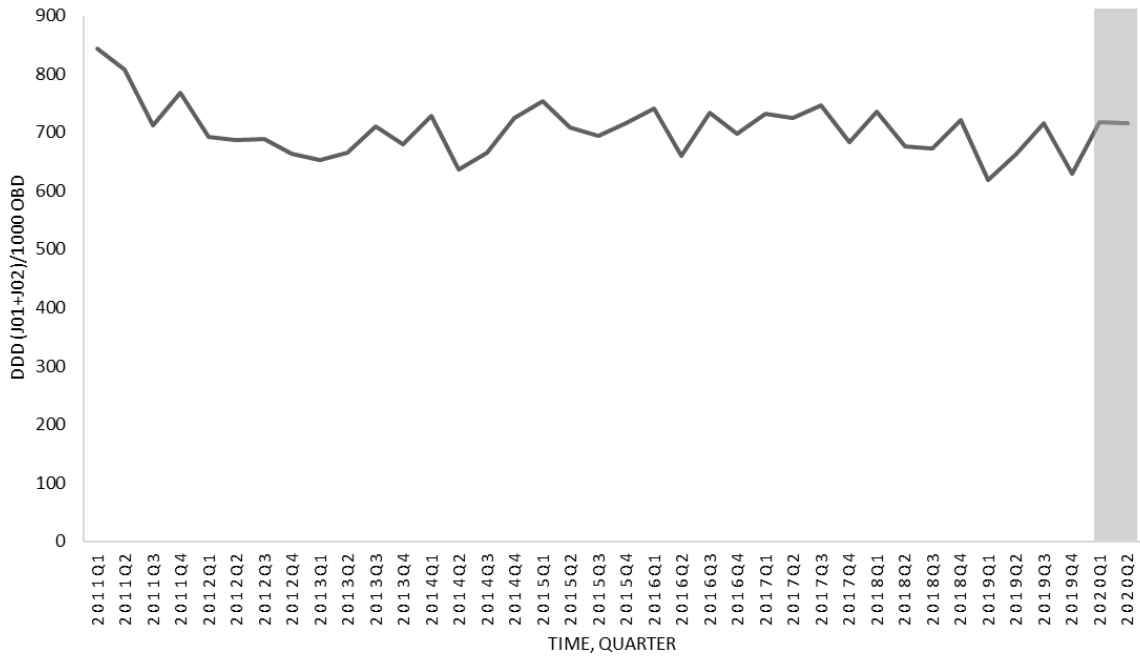

**Figure S1.** Changes in antibiotic consumption since PRIOAM implementation. DDD, defined daily doses; ATC group J01 (antibacterials for systemic use) and J02 (antifungals); OBD, occupied bed days; Q, quarter.

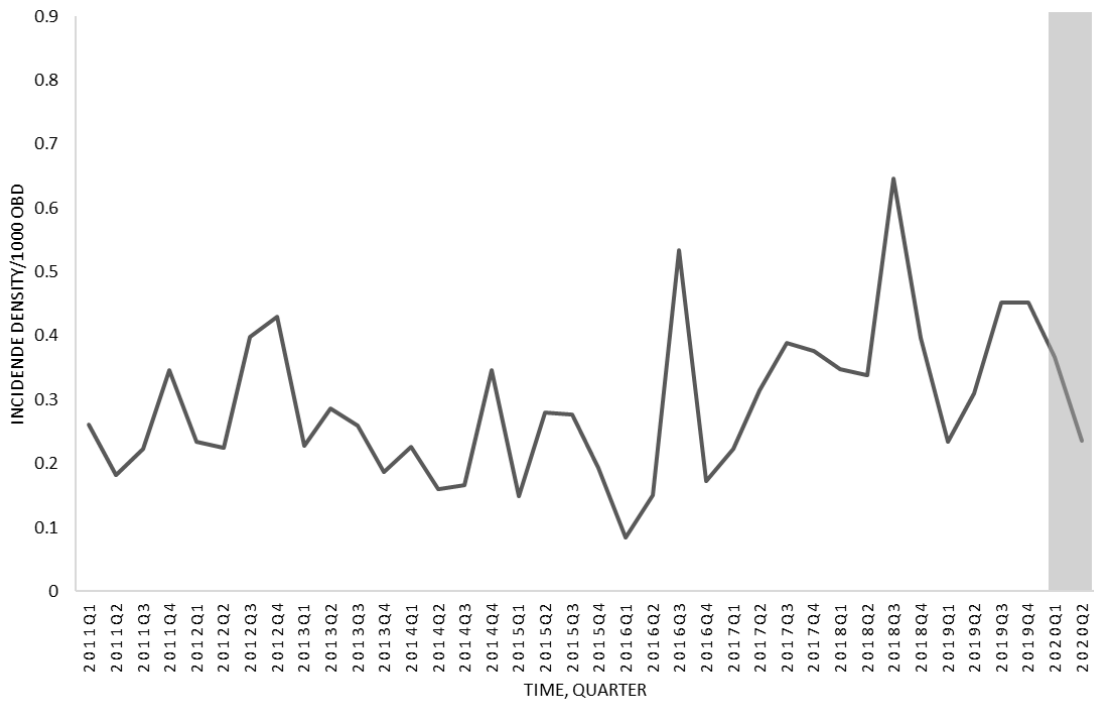

**Figure S2.** Changes in the incidence of hospital-acquired bloodstream infections (BSI) produced by multidrug-resistant (MDR) organisms since PRIOAM implementation. OBD, occupied bed days; Q, quarter.

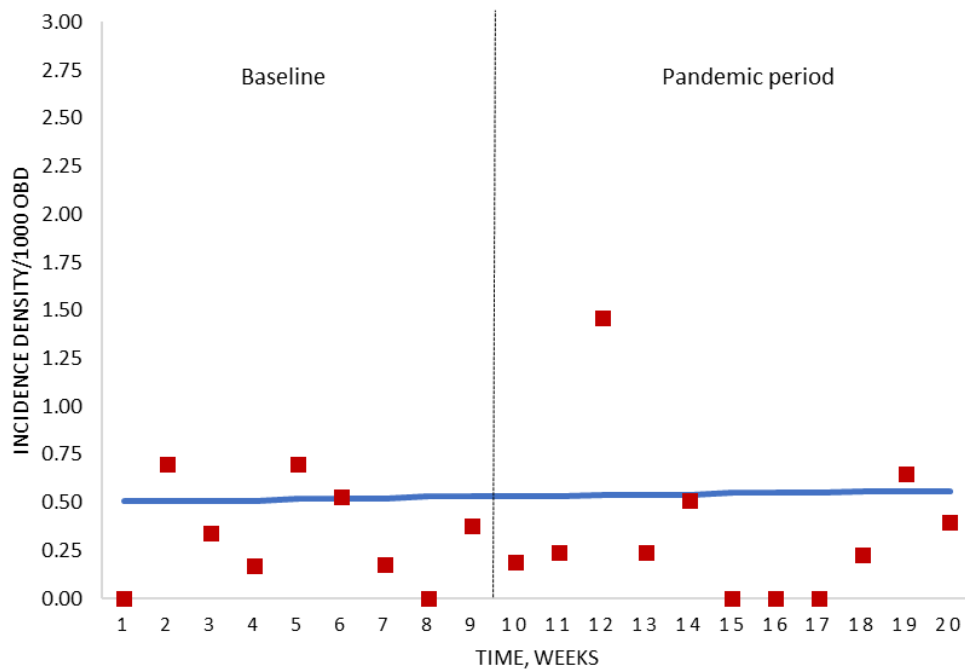

**Figure S3.** Segmented regression analysis of hospital-acquired candidemia and multidrug-resistant (MDR) bacterial bloodstream infections (BSI) for the period before the national lockdown (baseline) and the pandemic period. OBD, occupied bed days.

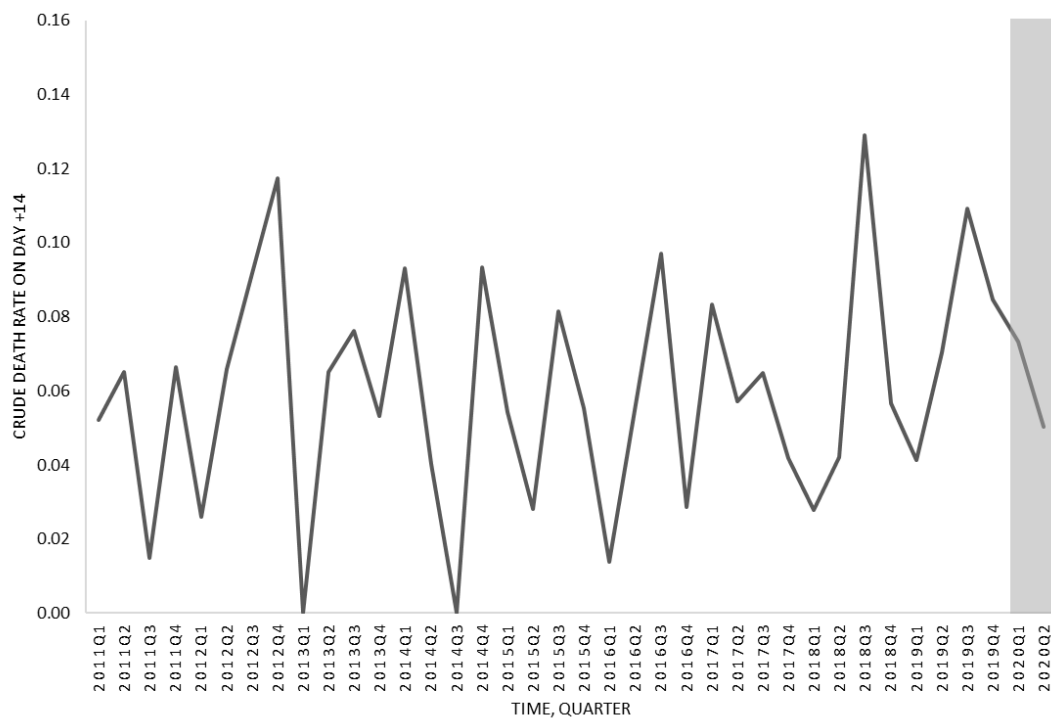

**Figure S4.** Changes in the cases of deaths per 1000 occupied bed days (OBD) on day +14 of hospital-acquired bloodstream infections (BSI) produced by multidrug-resistant (MDR) organisms since PRIOAM implementation. Q, quarter.

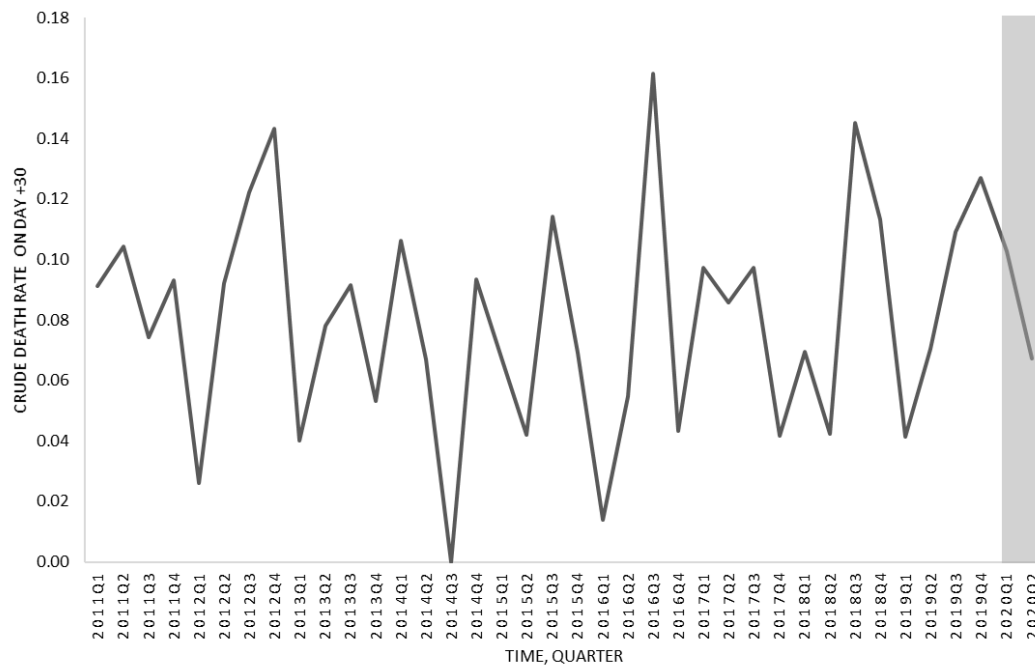

**Figure S5.** Changes in the cases of deaths per 1000 occupied bed days (OBD) on day +30 of hospital-acquired bloodstream infections (BSI) produced by multidrug-resistant (MDR) organisms since PRIOAM implementation. Q, quarter.

**Table S1.** Segmented regression analysis of antimicrobials consumption for the period before the national lockdown and the pandemic period.

| Time, Weeks | WPC    | 95% CI           | p-value |
|-------------|--------|------------------|---------|
| 1 to 3      | 15.471 | -6.389 to 42.436 | 0.155   |
| 3 to 9      | -0.863 | -3.573 to 1.924  | 0.497   |
| 9 to 15     | 3.530  | 0.822 to 6.310   | 0.016   |
| 15 to 20    | -6.434 | -9.080 to -3.711 | 0.001   |
| Full range  | 0.588  | -1.678 to 2.906  | 0.614   |

Data are presented as weekly defined daily doses (DDD) per 1000 occupied bed days (OBD). WPC=weekly percentage change. CI=confidence interval.

**Table S2.** Segmented regression analysis of antimicrobials consumption for the COVID-19 ward and the hospital without the COVID-19 ward during the pandemic period (weeks 10-20).

| Description        | Time, Weeks | WPC    | 95% CI            | p-value |
|--------------------|-------------|--------|-------------------|---------|
| Non COVID-19 wards | 10 to 12    | 15.027 | -7.285 to 42.708  | 0.163   |
|                    | 12 to 20    | -4.707 | -6.940 to -2.420  | 0.003   |
|                    | Full range  | -1.051 | -4.716 to 2.754   | 0.583   |
| COVID-19 ward      | 10 to 15    | 44.951 | 16.382 to 80.532  | 0.006   |
|                    | 15 to 20    | -4.498 | -17.387 to 10.402 | 0.467   |
|                    | Full range  | 17.657 | 5.891 to 30.730   | 0.002   |

Data are presented as weekly defined daily doses (DDD) per 1000 occupied bed days (OBD). WPC=weekly percentage change. CI=confidence interval.

**Table S3.** Segmented regression analysis of hospital-acquired candidemia and multidrug-resistant (MDR) bacterial bloodstream infections (BSI) for the period before the national lockdown and the pandemic period.

| <b>Time, Weeks</b> | <b>WPC</b> | <b>95% CI</b>   | <b><i>p</i>-value</b> |
|--------------------|------------|-----------------|-----------------------|
| <b>Full range</b>  | 0.541      | -4.164 to 5.477 | 0.816                 |

Data are presented as weekly cases per 1000 occupied bed days (OBD). WPC=weekly percentage change. CI=confidence interval.
